# Supplementary material
Source: publisher site journal article supplement (https://www.dovepress.com/article/304199)
Supplement: Supplementary file 1 [file get_supplementary_file.php]

| TABLE S1 The demographic and clinical characteristics of study population | | | | | | | | | | |
| --- | --- | --- | --- | --- | --- | --- | --- | --- | --- | --- |
|  | PTE1 | PTE2 | PTE3 | PTE4 | PTE5 | HC1 | HC2 | HC3 | HC4 | HC5 |
| Age, years | 52 | 55 | 59 | 49 | 64 | 55 | 60 | 50 | 45 | 51 |
| Sex | Male | Female | Female | Male | Female | Male | Male | Female | Female | Female |
| Risk stratification | | | | | | | | | | |
| Low-risk |  | Yes | Yes |  | Yes |  |  |  |  |  |
| Intermediate-risk | Yes |  |  |  |  |  |  |  |  |  |
| High-risk |  |  |  | Yes |  |  |  |  |  |  |
| Symptoms | | | | | | | | | | |
| Syncope | No | No | No | Yes | No | No | No | No | No | No |
| Dyspnea | Yes | Yes | No | No | No | No | No | No | No | No |
| Chest pain | No | Yes | Yes | No | No | No | No | No | No | No |
| Cough | No | Yes | No | No | Yes | No | No | No | No | No |
| Haemoptysis | No | No | No | No | No | No | No | No | No | No |
| Blood pressure | 110/87 | 120/85 | 135/78 | 85/53 | 125/88 |  |  |  |  |  |
| Right ventricular diameter, mm | 35 | 32 | 27 | 42 | 30 |  |  |  |  |  |
| Pulmonary artery pressure, mmHg | 60 | Normal | 36 | 38 | Normal |  |  |  |  |  |
| D-dimer, ug/ml | 1.081 | 1.894 | 0.274 | 12.984 | 1.729 |  |  |  |  |  |
| DVT | Yes | Yes | No | Yes | No |  |  |  |  |  |
| Therapy | AC | AC | AC | TB | AC |  |  |  |  |  |
| TABLE S1: AC: anticoagulant; TB: thrombolysis. | | | | | | | | | | |


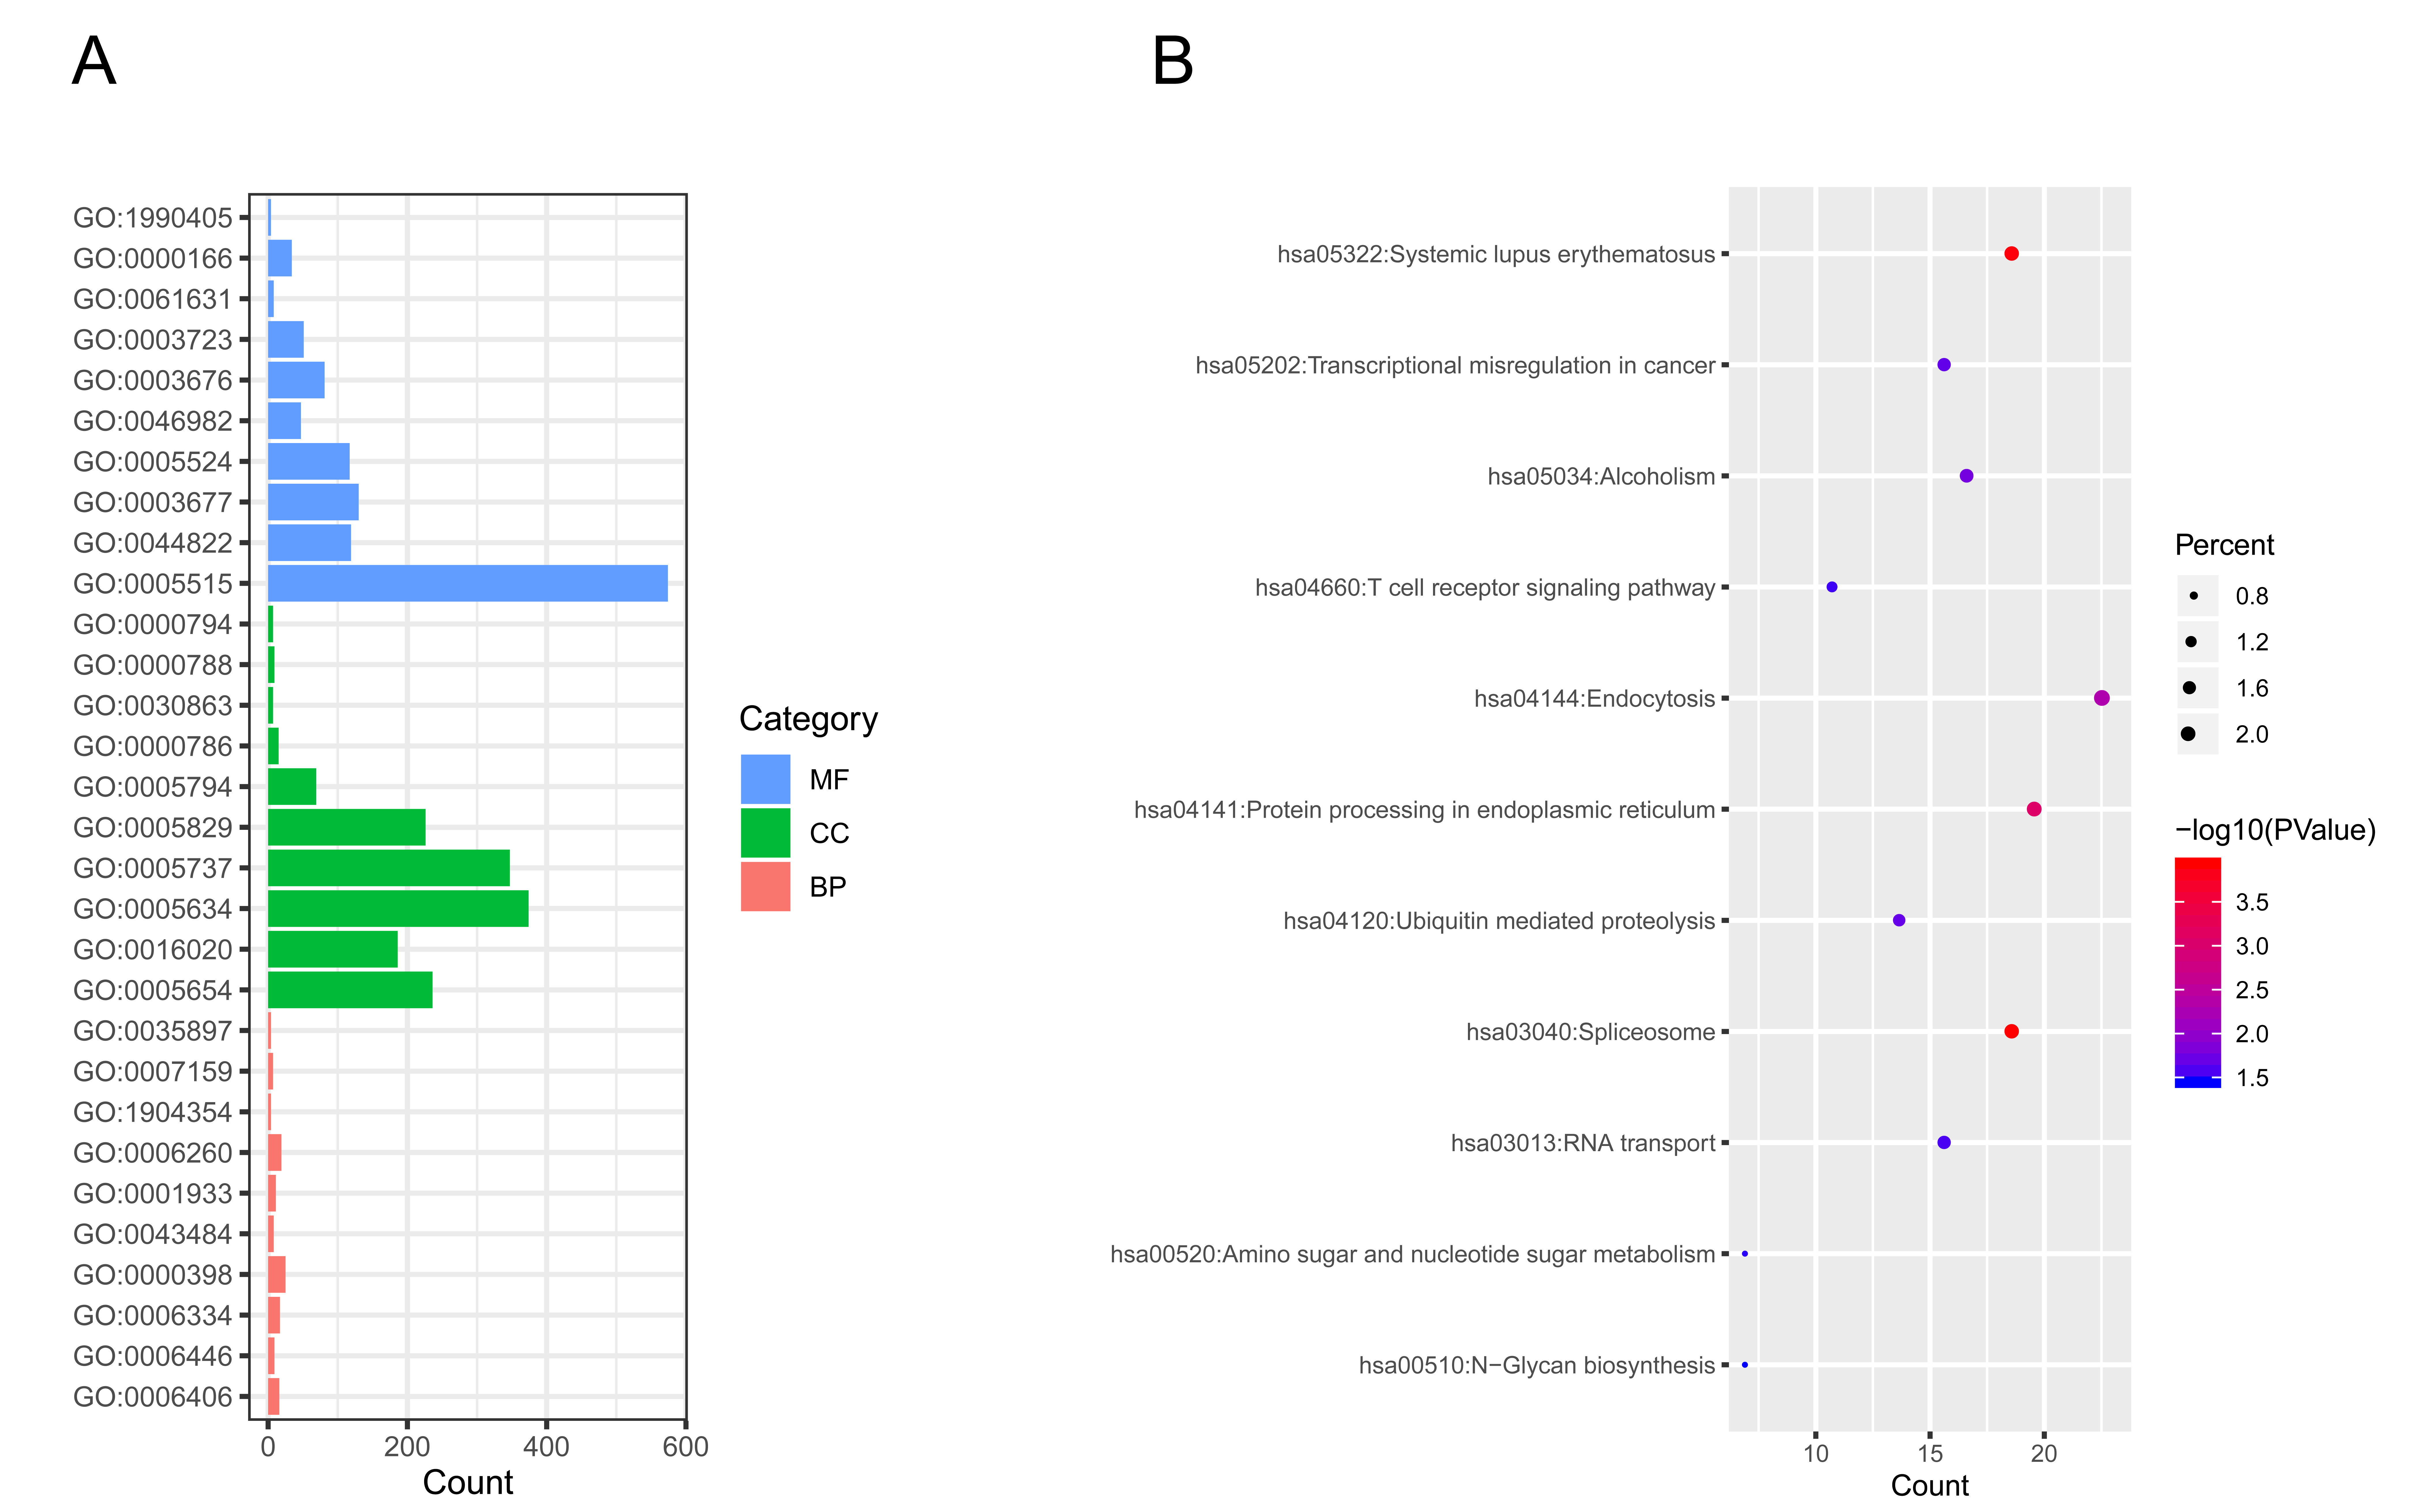


**Figure S1** GO and KEGG analyses were performed for the predicted target genes of differentially expessed miRNA. (A) GO enrichment for targeted mRNAs. (B) KEGG pathway enrichment for targeted mRNAs. GO: Gene Ontology; KEGG: Kyoto Encyclopedia of Genes and Genomes.
